# Supplementary material for: Dpp dependent Hematopoietic stem cells give rise to Hh dependent blood progenitors in larval lymph gland of Drosophila
Source: eLife. 2016 Oct 26;5:e18295. doi: 10.7554/eLife.18295 (PMC5120881; doi:10.7554/eLife.18295)
Supplement: Figure 1—source data 1. [file elife-18295-fig1-data1.xlsx]

## Sheet: Image Q
		8hrs				13hrs		18hrs
		Low GFP daughter cells	Notch-GFP cells		Low GFP daughter cells	Notch-GFP cells		Low GFP daughter cells	Notch-GFP cells
	1	0	5		12	4		7	5
	2	0	5		10	5		10	5
	3	0	4		13	5		10	3
	4	0	4		12	5		9	4
	5	0	5		11	5		11	3
	6	0	5		8	5		10	2
	7	0	4		8	5		10	2
	8	0	5		10	5		9	2
	9	0	5		10	5		10	5
	10	0	5		10	5		10	3
	11	0	5		10	4		10	3
	12	0	5		10	5		12	3
	13	0	5		6	5		7	3
	Average	0	4.76923		10	4.84615		9.61538	3.30769
	Standard Deviation	0	0.438529		1.87083	0.375534		1.38675	1.1094
					2.14882e-10	0.635406		1.01648e-11	0.000452703
		Average number of cells per lg lobe
			Low GFP daughter cells	Notch-GFP cells
		8hrs	0	4.76923
		13hrs	10	4.84615
		18hrs	9.61538	3.30769
		Standard deviation
			Low GFP daughter cells	Notch-GFP cells
		8hrs	0	0.438529
		13hrs	1.87083	0.375534
		18hrs	1.38675	1.1094

## Sheet: Image R
			n	Notch-GFP total area	Notch-GFP cells nuclear area		Neighboring cells total area	Neighbouring cells nuclear area
			1	89.95	22.49		15.64	9.64
			2	75.71	12.98		15.68	9
			3	74.96	19.19		15.78	9.34
			4	69.04	16		16.64	9.32
			5	68.12	23.02		16.85	14.62
			6	66.5	14.12		17	10.7
			7	66.03	14.1		17.07	11.31
			8	65.49	17.81		17.43	12.95
			9	64.4	19.23		18.19	10.54
			10	64.07	28.11		19.57	8.97
			11	62.84	19.73		19.6	11.06
			12	58.73	10.36		19.61	14.74
			13	58.67	21.41		20.06	12.32
			14	58.21	10.64		20.43	7.54
			15	58.07	15.88		20.97	14
			16	56.76	20.43		21	6.36
			17	56.62	16.73		21.28	11.99
			18	56.38	16.66		21.3	11.63
			19	55.92	17.6		21.35	9.4			Average
			20	53.49	15		21.5	9.83				Total area	Nuclear area
			21	53.24	17.22		22.03	15.84			Notch -GFP cells	55.6344	16.8616
			22	53.03	16.09		22.1	12.07			Neighboring cells	22.25	12.1407
			23	52.85	14.31		22.12	11.91
			24	52.77	16.49		22.2	15.11			Std dev
			25	52.56	12.79		22.23	12.21				Total area	Nuclear area
			26	51.91	14.89		22.25	14.03			Notch -GFP cells	9.93279	3.21989
			27	51.84	15.55		22.42	10			Neighboring cells	4.1206	2.47408
			28	51.12	18.51		22.45	9.31
			29	51.03	15.61		22.8	15.14
			30	50.9	19.19		23.26	12.44
			31	49.86	17.04		23.84	12.5
			32	49.67	17.13		23.84	13.83
			33	49.54	17.58		24.09	14.17
			34	49.35	16.35		24.44	13.67
			35	48.04	13.19		24.68	13.74
			36	47	18.75		25.07	14.45
			37	45.83	14.09		25.56	10.34
			38	45.76	18.36		25.9	9.74
			39	45.6	19.26		26.34	13.03
			40	44.27	14.38		27.35	11.58
			41	44.06	14.88		27.84	12.23
			42	43.77	16.69		28	15.02
			43	42.57	17.64		28.83	17.05
			44	41.06	14.43		29.05	15.05
			45	55.96	16.86		35.61	16.61
			Average	55.6344	16.8616		22.25	12.1407
			Standard deviation	9.93279	3.21989		4.1206	2.47408
			two tailed unpaired Student’s t-test				8.50672e-29	1.68523e-11

## Sheet: F.I for image Q and R
		n	Area	flurescence intensity	Total Fl intensity
		1	18.795	30.715	577.288	16	23.105	43.161	997.235		31	25.743	16.069	413.664
		2	12.677	28.344	359.317	17	24.06	37.989	914.015		32	23.206	24.93	578.526
		3	13.218	28.829	381.062	18	24.656	30.509	752.23		33	24.941	20.952	522.564
		4	18.122	21.656	392.45	19	24.944	25.92	646.548		34	22.415	19.236	431.175
		5	44.166	15.862	700.561	20	48.37	18.991	918.595		35	37.27	26.455	985.978
		6	24.644	14.847	365.889	21	28.972	17.482	506.489		36	24.112	22.427	540.76
		7	31.399	14.302	449.068	22	41.87	18.344	768.063		37	30.857	29.704	916.576
		8	27.691	25.137	696.069	23	28.191	25.342	714.416		38	36.822	32.688	1203.64
		9	22.639	15.904	360.051	24	23.623	13.755	324.934		39	26.013	20.827	541.773
		10	27.223	13.899	378.372	25	23.959	15.248	365.327		40	25.639	26.016	667.024
		11	35.739	45.507	1626.37	26	29.854	16.07	479.754		41	19.911	23.868	475.236
		12	28.555	58.343	1665.98	27	26.3	14.677	386.005		42	25.602	25.795	660.404
		13	23.692	21.574	511.131	28	20.496	16.032	328.592		43	21.958	32.572	715.216
		14	25.263	27.095	684.501	29	39.824	22.062	878.597		44	18.53	30.942	573.355
		15	35.677	33.151	1182.73	30	24.079	19.35	465.929		45	24.11	17.219	415.15
	Average		25.9667	26.3443	684.075		28.8202	22.3288	643.52			25.8086	24.6467	636.096
					Notch-GFP cells	First batch of progenitors	Fold change
				Notch-GFP cells	684.07	88.17	7.75853
				First batch of progenitors	643.52	71.09	9.05219	7.81222			7.812
					636.09	96	6.62594
				Average	654.56	85.0867	7.81222
