# Supplementary material for: Dpp dependent Hematopoietic stem cells give rise to Hh dependent blood progenitors in larval lymph gland of Drosophila
Source: eLife. 2016 Oct 26;5:e18295. doi: 10.7554/eLife.18295 (PMC5120881; doi:10.7554/eLife.18295)
Supplement: Figure 2—source data 1. [file elife-18295-fig2-data1.xlsx]

## Sheet: Figure 2N
			8h						13h					15h					18h
			n number	G1	S	G2	M		G1	S	G2	M		G1	S	G2	M		G1	S	G2	M
			1	1	3	1	0		0	3	2	0		1	2	3	1		0	0	0	2
			2	1	2	2	0		0	5	0	0		0	2	2	1		0	2	0	0
			3	2	3	1	0		0	4	0	1		0	2	1	2		0	0	1	0
			4	0	3	2	0		1	3	0	1		0	2	3	1		0	2	0	0
			5	1	3	1	0		0	1	2	1		0	0	2	1		0	0	0	0
			6	2	2	1	0		0	6	0	0		0	2	1	1		0	0	0	0
			7	2	3	0	0		0	3	0	1		0	2	1	1		0	0	1	0
			8	2	3	1	0		0	4	0	1		0	3	1	2		0	0	0	0
			9	2	2	1	0		0	3	0	1		1	2	3	1		0	0	0	2
			10	1	3	1	0		0	3	0	1		0	2	2	1		0	2	0	0
			11	2	2	0	0		0	5	0	0		0	2	1	2		0	0	1	0
			12	3	2	0	0		0	4	1	0		0	2	3	1		0	2	0	0
			13	0	3	2	0		0	5	0	0		0	0	2	1		0	0	0	0
			14	0	4	1	0		1	3	1	0		0	2	1	1		0	0	0	0
			15	0	3	2	0		0	5	0	0		0	2	1	1		0	0	1	0
			16	1	3	1	0		0	5	0	0		0	3	1	2		0	0	0	0
			17	1	2	2	0		1	1	3	0		1	2	3	1		0	0	0	2
			18	3	0	2	0		1	4	0	1		0	2	2	1		0	2	0	0
			19	0	3	2	0		0	3	1	1		0	2	1	2		0	0	1	0
			20	1	3	1	0		0	4	1	0		0	2	3	1		0	2	0	0
			21	2	2	1	0		0	3	2	0		0	0	2	1		0	0	0	0
			22	2	3	0	0		0	3	2	0		0	2	1	1		0	0	0	0
			23	3	0	2	0		1	1	2	1		0	2	1	1		0	0	1	0
			24	2	2	1	0		1	4	0	0		0	3	1	2		0	0	0	0
			25	1	3	1	0		1	3	1	0		1	2	3	1		0	0	0	2
			26	2	2	0	0		1	3	1	0		0	2	2	1		0	2	0	0
			27	3	2	0	0		1	4	0	0		0	2	1	2		0	0	1	0
			28	0	3	2	0		1	2	1	1		0	2	3	1		0	0	0	0
			Average	1.42857	2.46429	1.10714	0		0.357143	3.46429	0.714286	0.392857		0.111111	1.88889	1.77778	1.25926		0	0.518519	0.259259	0.222222
			Standard deviation	0.997351	0.881167	0.737327	0		0.48795	1.26146	0.89679	0.497347		0.320256	0.751068	0.847319	0.446576		0	0.893152	0.446576	0.640513
			Square root(n)	5.2915	5.2915	5.2915	5.2915		5.2915	5.2915	5.2915	5.2915		5.2915	5.2915	5.2915	5.2915		5.2915	5.2915	5.2915	5.2915
			S.E	0.188482	0.166525	0.139342	0		0.0922139	0.238393	0.169477	0.0939898		0.0605228	0.141938	0.160128	0.0843949			0.16879	0.0843949	0.121046
			two tailed unpaired Student’s t-test						8.83307e-06	0.00121289	0.0791808	0.00027463		0.0664793	9.90839e-07	1.79435e-05	8.49479e-09			4.17476e-08	1.26203e-10	2.30293e-07
							Average
								G1	S	G2	M
							8h	1.42857	2.46429	1.10714	0
							13h	0.357143	3.46429	0.714286	0.392857
							15h	0.111111	1.88889	1.77778	1.25926
							18h	0	0.518519	0.259259	0.222222
							S.E.
								G1	S	G2	M
							8h	0.188482	0.166525	0.139342	0
							13h	0.0922139	0.238393	0.169477	0.0939898
							15h	0.0605228	0.141938	0.160128	0.0843949
							18h	0	0.16879	0.0843949	0.121046

## Sheet: Figure2 figure supplement 1
			8 hrs						13 hrs						18 hrs
			n	S/G2	M				n	S/G2	M				n	S/G2	M
			1	4	0				1	3	3				1	3	1
			2	6	0				2	4	2				2	1	0
			3	5	0				3	1	1				3	2	0
			4	2	0				4	4	2				4	1	0
			5	6	0				5	2	2				5	3	0
			6	3	0				6	2	1				6	0	0
			7	2	0				7	3	1				7	1	0
			8	1	0				8	4	2				8	0	0
			9	4	0				9	6	0				9	0	0
			10	3	0				10	5	1				10	0	0
			11	6	0				11	3	1				11	0	0
			12	6	0				12	6	0				12	0	0
			13	3	0				13	6	0				13	0	0
			14	4	0				14	3	1				14	0	0
			15	1	0				15	5	1				15	0	0
			16	5	0				16	0	2				16	0	1
			17	6	0				17	4	1				17	0	0
			18	4	0				18	4	2				18	1	3
			19	4	0				19	2	3				19	0	1
			20	4	0				20	2	2				20	0	0
			21	4	0				21	1	2				21	0	2
			22	1	1				22	2	1				22	0	0
			23	1	0				23	6	0				23	0	2
			24	5	0				24	6	0				24	0	0
			25	4	0				25	5	1				25	1	0
			26	5	0				26	5	1				26	2	0
			27	4	0				27	5	1				27	0	0
			28	2	1				28	2	1				28	0	0
			29	3	1				29	3	1				29	0	0
			30	6	0				30	3	3				30	0	0
			31	6	0				31	2	2				31	0	0
			AVERAGE	3.87097	0.0967742				AVERAGE	3.51613	1.32258				Average	0.483871	0.322581
			STD DEV	1.66817	0.300537				S.D	1.69058	0.871286				Std Dev	0.889605	0.747757
			sqrt(31)	5.65685					SQRT N	5.65685					sqrt	5.65685
			STD Error	0.294894	0.053128				S.E.	0.298855	0.154023				Std E.	0.157262	0.132186
			t test						t test	0.408799	8.18287e-09				t test	4.63838e-13	0.126735
				Average
					8 hrs	13 hrs	18 hrs
				S/G2	3.87097	3.51613	0.483871
				M	0.0967742	1.32258	0.322581
				S. E.
					8 hrs	13 hrs	18 hrs
				S/G2	0.294894	0.298855	0.157262
				M	0.053128	0.154023	0.132186
