# Supplementary material for: Dpp dependent Hematopoietic stem cells give rise to Hh dependent blood progenitors in larval lymph gland of Drosophila
Source: eLife. 2016 Oct 26;5:e18295. doi: 10.7554/eLife.18295 (PMC5120881; doi:10.7554/eLife.18295)
Supplement: Figure 6—source data 1. [file elife-18295-fig6-data1.xlsx]

## Sheet: Figure 6E
	total no of cells
	n number	Dome-MESO-LacZ; N-GAL4/+	Dome-MESO-LacZ; N-GAL4/UAS-rpr; tubGal80ts
	1	3015	510
	2	2241	395
	3	2280	427
	4	2799	400
	5	2664	581
	6	2584	672			Dome-MESO-LacZ; N-GAL4/+	2255	345.344
	7	2587	630			Dome-MESO-LacZ; N-GAL4/UAS-rpr; tubGal80ts	562.364	113.484
	8	3306	700
	9	2258	628
	10	2491	566
	11	2255	677
	average	2255	562.364
	std dev	345.344	113.484
	ttest		2.94016e-10

## Sheet: Figure 6F
		total dome positive area/total area of lg lobe in Dome-MESO-LacZ; N-GAL4/+	total dome positive area/total area of lg lobe in Dome-MESO-LacZ; N-GAL4/UAS-rpr; tubGal80ts
	1	0.79838	0.486153
	2	0.78658	0.323117
	3	0.7985	0.328752
	4	0.79301	0.285185
	5	0.737613	0.163492
	6	0.79838	0.204108
	7	0.78421	0.348192
	8	0.79503	0.242108
	9	0.737613	0.342507
	10	0.81038	0.436498
	11	0.77038	0.436498
	Average	0.782734	0.326965
	Standard Deviation	0.0244963	0.100404
	two tailed unpaired Student’s t-test		1.2172e-08
