# Supplementary material for: Dpp dependent Hematopoietic stem cells give rise to Hh dependent blood progenitors in larval lymph gland of Drosophila
Source: eLife. 2016 Oct 26;5:e18295. doi: 10.7554/eLife.18295 (PMC5120881; doi:10.7554/eLife.18295)
Supplement: Figure 7—source data 1. [file elife-18295-fig7-data1.xlsx]

## Sheet: Figure 7R
	w1118		mad rnai		dppts/dppd12		dppd12		dpp rnai		dppd12/d14		tkv4/tkv7		mad12/mad1-2
	3015		584		700		110		882		370		860		353
	2241		839		488		188		1109		607		1235		442
	2280		522		899		211		1072		431		1127		488
	2799		629		709		72		894		729		669		700
	2664		713		578		86		1105		735		981		626
	2584		620		584		124		879		706		1336		881
	2587		664		648		156		761		426		949		458
	3306		828		700		83		923		721		430		817
	2258		797		850		80		701		321		667		462
	2491		835		760		65		560		456		531		458
	2255		788		883		82		889		473		766		648
Average	2589.09		710.818		709.9		114.7		889.3		543.182		868.273		575.727
Standard Deviation	345.344		113.067		132.048		49.854		170.248		158.658		289.138		170.422
two tailed unpaired Student’s t-test			7.26914e-10		3.76329e-10		2.28051e-10		3.98092e-10		4.74955e-11		7.7791e-11		3.81811e-11
			Average number of cells per lobe
				wild type	2589.09
				AntpXdppRNAi	889.3
				NXMadRNAi	710.818
				dppts/dppd12	709.9
				dppd12/d14	543.182												Figue
				tkv4/tkv7	868.273
				mad12/mad1-2	575.625
			Standard Deviation
				wild type	345.344
				AntpXdppRNAi	170.248
				NXMadRNAi	113.067
				dppts/dppd12	132.048
				dppd12/d14	158.658
				tkv4/tkv7	289.138
				mad12/mad1-2	170.422

## Sheet: Figure 7 figure supplement1D
			MadRNAi				dpp rnai
			big cell	progenitor		big cell	progenitor
			13.011	9.968		11.752	10.379
			13.149	10.049		11.961	10.39
			13.32	10.558		11.974	10.638
			13.595	10.565		11.991	11.227
			13.612	10.645		12.33	11.267
			13.781	11.136		12.504	11.422
			13.787	11.272		13.178	11.833
			13.82	11.62		13.214	11.915
			13.886	11.842		13.225	11.984
			14.095	11.918		13.359	11.994
			14.186	12.028		13.436	12.23
			14.21	12.151		13.514	12.313
			14.308	12.322		13.589	12.565
			14.373	12.73		13.603	12.608
			14.433	12.747		13.688	12.623
			14.727	12.769		13.756	12.629
			14.754	12.818		13.864	12.71
			14.815	13.247		13.912	12.735
			14.935	13.274		14.058	12.92
			15.157	13.288		14.22	13.006
			15.247	13.34		14.253	13.016
			15.335	13.439		14.911	13.055
			15.355	13.44		15.337	13.149
			15.402	13.454		15.483	13.208
			15.548	13.48		15.543	13.265
			15.733	13.591		15.604	13.368
			15.966	13.666		15.908	13.439
			16.025	13.698		16.11	13.45
			16.1	13.797		16.112	13.478			Nuclear area in um2
			16.305	13.946		16.204	13.608				wild type	N-Gal4, UAS-MadRNAi	antp-GAL4, UAS-Dpp RNAi
			16.416	13.992		16.424	13.622			First row of big cells	19.8128	15.1934	14.7829
			16.479	14.122		16.637	13.622			Progenitors	12.4001	12.9047	12.8578
			16.48	14.136		16.922	13.676
			16.532	14.196		17.05	13.677			Standard deviation
			16.534	14.325		17.192	13.98				wild type	N-Gal4, UAS-MadRNAi	antp-GAL4, UAS-Dpp RNAi
			16.716	14.402		17.288	14.09			First row of big cells	1.97512	1.29894	1.88428
			16.772	14.442		17.29	14.552			Progenitors	1.47315	1.34506	1.15286
			17.209	14.452		17.798	14.655
			17.713	14.63		17.932	14.994
			17.916	14.691		18.191	15.021
			15.1934	12.9047		14.7829	12.8578
			1.29894	1.34506		1.88428	1.15286
			#DIV/0!	#DIV/0!		#DIV/0!	#DIV/0!

## Sheet: Figure 7 figure supplement1M
			w1118		antp>dpprnai		dppd12/d14
		1	52		50		91
		2	53		53		90
		3	45		43		89
		4	47		40		134
		5	45		53		91
		6	55		42		90
		7	46		43		89
		8	48		51		91
		9	54		54		89
		10	40		52		91
		Average	48.5		48.1		94.5
		Standard deviation	4.83621		5.42525		13.9064
		two tailed unpaired Student’s t-test			0.856284		7.49838e-07
	total number of niche cells
		W1118	48.5
		tubgal80ts; antp>GFP>dppRNAi	48.1
		dppd12/d14	94.5
	Standard deviation
		W1118	4.836
		tubgal80ts; antp>GFP>dppRNAi	5.425
		dppd12/d14	7.498
