# Supplementary material for: Dpp dependent Hematopoietic stem cells give rise to Hh dependent blood progenitors in larval lymph gland of Drosophila
Source: eLife journal article supplement (doi:10.7554/elife.18295), 2016-10-26
Supplement: supp [file elife_poa_e18295_Supplementary_File_1.docx]

**Dey et al.,**

**Table S1: Fly stocks used and genotypes of the lines used**

| **Sl** | **Line** | **Genotype** | **Source** |
| --- | --- | --- | --- |
| **Gal4 Driver lines** | | | |
| 1 | *dot-Gal4* | *w;P{w[+mC]=dot-Gal4.K}11C/ P{w[+mC]=dot-Gal4.K}11C;+/+* | From D. Kimbrell |
| 2 | *Notch-Gal4* | *w;+/+;P{GMR30C06-GAL4}attP2/P{GMR30C06-GAL4}2* | BDSC Stock # 49528 |
| 3 | *Antp-Gal4* | *w; P {tubP-GAL80ts}; antp-Gal4, UAS-GFP/Tm2* | Modified from ([Emerald and Cohen 2004](#_ENREF_18)) |
| 4 | *dome-Gal4* | *dome-Gal4, UAS-GFP/ FM7;P {tubP-GAL80ts}s/+; +/+* | Modified from *(*[*Ghiglione et al. 2002*](#_ENREF_25)*)* |
| 5 | *Hs-Gal4* | *w1118; P{GAL4-Hsp70.PB}89-2-1* | BDSC Stock # 1799 |
| 6 | *Upd3-Gal4* | *w1118; Upd3-Gal4, UAS-GFP;+/+* | ([Agaisse et al. 2003](#_ENREF_2)) |
| 7 | *Hml-Gal4* | *w1118; P{w[+mC]=Hml-GAL4.Delta}2, P{w[+mC]=UAS-2xEGFP}AH2* | BDSC Stock # 30140 |
| 8 | *tepIV-Gal4* | *y* w1118; P{w+mW.hs=GawB}NP7379 / CyO, P{w-=UAS-lacZ.UW14}UW14* | DGRC Koyoto Stock#105442 |
| **UAS lines** | | | |
| 1 | *UAS 2XEGFP* | *w1118; UAS-2xEGFP; +/+* | BDSC Stock # 6874 |
| 2 | *GTRACE* | *w1118; UAS RFP,UAS FLP,Ubip63FRT-STOP-FRT GFP/cyo;+/+* | ([Evans et al. 2009](#_ENREF_20)) |
| 3 | *UAS-H2bYFP* | *w1118; P[mw, UAS-Histone2B::YFP]; P[mw, UAS-Histone2B::YFP]/TM6* | from F. Shweisguth ([Bellaiche et al. 2001](#_ENREF_7)) |
| 4 | *UAS-Fucci* | *w1118; P{w[+mC]=UAS-GFP.E2f1.1-230}32 P{w[+mc]=UAS- mRFP.NLS.CycB.1-266}19/cyo,P{ry[+t7.2]=en1}wg[en11];MKRS/TM6B, Tb[1]*  *w1118; UAS-S/G2/M-Green; +* | BDSC Stock # 55121  From M.Miura ([Sakaue-Sawano et al. 2008](#_ENREF_21)) |
| 5 | *UAS-dicer* | *w1118; P{UAS-Dcr-2.D}2; +/+* | BDSC Stock # 24650 |
| 6 | *UAS-apoliner* | *w1118; P{w[+mC]=UAS-Apoliner}5* | BDSC Stock # 32122 |
| **Reporter lines** | | | |
| 1 | *12XSu(H) LacZ* | *w; 12XSu(H) LacZ; +/+* | From A. Tsakonas ([Go, Eastman, and Artavanis-Tsakonas 1998](#_ENREF_27)). |
| 2 | *dome-MESO-LacZ* | *domeMESO-LacZ; +/+;+/+* | From J.C Hombria ([Hombria et al. 2005](#_ENREF_32)) |
| 3 | *10XSTAT92EGFP* | *w1118;10XSTAT92EGFP:+/+* | From E. Bach ([Bach et al. 2007](#_ENREF_5)) |
| 4 | *E(spl)mβ-CD2* | *w1118; E (spl) mβCD2;+/+* | From K. Moberg ([de Celis et al. 1998](#_ENREF_12)), |
| 4 | *MadGFP* | *w1118; PBac{MAD-GFP.FLAG}VK00033;+/+* | BDSC Stock # 38663 |
| 5 | *Hhf4fGFP* | *w1118 ;P{hhF4f-GFP}* | From R. Schulz ([Tokusumi et al. 2010](#_ENREF_85)) |
| 6 | *dome-MESO EBF2* | *dome-MESO EBF2/Fm7i; +/+;+/+* | From U. Banerjee ([Evans, Liu, and Banerjee 2014](#_ENREF_19)) |
| **RNAi Lines from Transgenic RNAi Project [TRiP]** | | | |
| 1 | *Dpp RNAi* | *y[1] v[1]; P{y[+t7.7] v[+t1.8]=TRiP.HMS00011}attP2* | BDSC Stock # 33618. Also used in  ([Li, Qi, and Jasper 2013](#_ENREF_52)); ([Guo, Driver, and Ohlstein 2013](#_ENREF_30)) |
| 2 | *Mad RNAi* | *y[1] v[1]; P{y[+t7.7] v[+t1.8]=TRiP.JF01263}attP2* | ([Hombria et al. 2005](#_ENREF_32)) BDSC Stock # 31315. Also used in ([Guo, Driver, and Ohlstein 2013](#_ENREF_30)) |
| **Mutant lines** | | | |
| 1 | *dpp* | - *w1118, dpp[d12]/ CyOAct-GFP* - *w1118;* *dpp[d14]/ CyOAct-GFP* - *w1118;* *dpp[hr56] cn[1] bw[1]/ CyOAct-GFP* | Modified from BDSC Stock # 2070  Modified from BDSC Stock # 3555  Modified from BDSC Stock # 36528 |
| 2 | *mad* | - *w1118; Mad12P{neoFRT}40A/CyOAct-GFP* - *w1118;Mad[1-2] P{ry[+t7.2]=neoFRT}40A/ CyOAct-GFP* | Modified from BDSC Stock # 58785  Modified from BDSC Stock # 7323 |
| 3 | *tkv* | - *tkv7, cn1, bw1, sp1/CyOAct-GFP* - *tkv[1]* | Modified from BDSC Stock # 3242.  BDSC Stock # 427 |

| **Drivers** | **Genotypes of lines used for this study** |
| --- | --- |
| *antp-Gal4* | - *w1118; Mad GFP/+; antp-Gal4, UAS-mCD8RFP/+* - *w1118; E (spl) mβCD2/+; antp-Gal4, UAS-GFP/ UAS Dpp RNAi* - *w; P {tubP-GAL80ts}; antp-Gal4, UAS-GFP/UAS Dpp RNAi* |
| *N-Gal4* | - *w1118;UAS-2XEGFP; N-Gal4* - *w1118; E(spl)mβ-CD2/UAS-2XEGFP; N-Gal4/+* - *w1118; E(spl)mβ-CD2/UAS-Fucci; N-Gal4/+* - *w1118; UAS-Fucci/+; N-Gal4/+* - *w1118; UAS-GFP-E2f11-230 UAS-mRFP1NLS-CycB1-266/+ ; N-Gal4* - *w1118;UAS RFP,UAS FLP,Ubip63FRT-STOP-FRT GFP/+;N-Gal4/P{tubP-GAL80ts}2* - *w1118;UAS RFP,UAS FLP,Ubip63FRT-STOP-FRT GFP/+;N-Gal4/+* - *w1118; Su(H) LacZ/ UAS-2XEGFP; N-Gal4/+* - *w1118; UAS Apoliner5; N-Gal4* - *w1118; E (spl) mβCD2/UAS-dcr2; N-Gal4/ UAS Mad RNAi* - *dome-MESO EBF2/+;UAS RFP,UAS FLP,Ubip63FRT-STOP-FRT GFP/+;N-Gal4/P{tubP-GAL80ts}2* - *dome-MESO-LacZ/UAS-rpr; P {tubP-GAL80ts}: N-Gal4* |
| *hs-Gal4* | *w1118; hs-Gal4/ UAS-Histone2B::YFP; UAS-Histone2B::YFP/+* |
| *dome-Gal4* | - *dome-Gal4/+;UAS-RFP,UAS FLP,Ubip63FRT-STOP-FRT GFP/P{tubP-GAL80ts}10;+* - *dome-MESO-LacZ/ dome-Gal4, UAS-GFP ; +; +* |
| *dot-Gal4* | - *dome-MESO-LacZ; dot-Gal4, UAS-GFP* - *w1118; dot-Gal4, UAS-GFP/ E(spl)mβ-CD2; +/+* |
| *tepIV-Gal4* | - *+;tepIV-Gal4, UAS-2xEGFP;+* - *w;UAS RFP,UAS FLP,Ubip63FRT-STOP-FRT GFP/tepIV-Gal4;P{tubP-GAL80ts}2/+* - *dome-MESO EBF2/+;tepIV-Gal4, UAS-GFP/+* |
